# Supplementary material for: Effects of ozone–climate interactions on the long-term temperature trend in the Arctic stratosphere
Source: Copernicus journal article supplement (doi:10.5194/acp-25-11557-2025), 2025-09-29
Supplement: Supplementary file 1 [file acp-25-11557-2025-supplement.pdf]

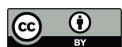

*Supplement of*

## **Effects of ozone–climate interactions on the long-term temperature trend in the Arctic stratosphere**

**Siyi Zhao et al.**

*Correspondence to:* Jiankai Zhang (jkzhang@lzu.edu.cn)

The copyright of individual parts of the supplement might differ from the article licence.

10 Contents of this file:

11 1. Equation S1-S3

12 2. Figure S1

### 13 **Refractive index**

14 The quasi-geostrophic refractive index (RI) is used to diagnose the environment of  
15 wave propagation (Chen and Robinson, 1992), is calculated as:

$$16 \quad RI = \frac{\bar{q}_\phi}{\bar{u}} - \left( \frac{k}{a \cos \phi} \right)^2 - \left( \frac{f}{2NH} \right)^2 \quad (S1)$$

17 where the meridional gradient of the zonal mean potential vorticity is calculated as:

$$18 \quad \bar{q}_\phi = \frac{2\Omega}{a} \cos \phi - \frac{1}{a^2} \left[ \frac{(\bar{u} \cos \phi)_\phi}{a \cos \phi} \right]_\phi - \frac{f^2}{\rho_0} \left( \rho_0 \frac{\bar{u}_z}{N^2} \right)_z \quad (S2)$$

19 where  $-\frac{f^2}{\rho_0} \left( \rho_0 \frac{\bar{u}_z}{N^2} \right)_z = \left( \frac{f^2}{HN^2} + \frac{f^2}{N^4} \frac{dN^2}{dz} \right) \bar{u}_z - \frac{f^2}{N^2} \bar{u}_{zz}$ , and  $H, q, k, N^2, \Omega, u_z$  are the scale  
20 height, potential vorticity, zonal wavenumber, buoyancy frequency, Earth's angular  
21 frequency, and zonal wind shear, respectively. The refractive index squared could be  
22 affected not only by atmospheric stability and wind shear, but also by the quadratic  
23 vertical shear of the zonal mean zonal wind. As discussed in Matsuno (1970), it is  
24 expected that planetary waves of wavenumber  $k$  tend to propagate toward regions where  
25  $n_k^2 > 0$  and are inhibited in regions where  $n_k^2 < 0$ .

### 26 **Takaya-Nakamura (T-N) wave activity flux**

27 The Takaya-Nakamura (T-N) wave activity flux (Takaya and Nakamura 1997; 2001;  
28 Nakamura et al., 2010) is used to represent the three-dimensional energy dispersion  
29 characteristics of the quasi-stationary Rossby wave with respect to climatological mean  
30 flow:

$$\begin{aligned}
31 \quad \mathbf{W} = \frac{p \cos \phi}{2|\mathbf{U}|} \cdot \left\{ \begin{aligned} & \frac{U}{a^2 \cos^2 \phi} \left[ \left( \frac{\partial \psi'}{\partial \lambda} \right)^2 - \psi' \frac{\partial^2 \psi'}{\partial \lambda^2} \right] + \frac{V}{a^2 \cos \phi} \left[ \frac{\partial \psi'}{\partial \lambda} \frac{\partial \psi'}{\partial \phi} - \psi' \frac{\partial^2 \psi'}{\partial \lambda \partial \phi} \right] \\ & \frac{U}{a^2 \cos \phi} \left[ \frac{\partial \psi'}{\partial \lambda} \frac{\partial \psi'}{\partial \phi} - \psi' \frac{\partial^2 \psi'}{\partial \lambda \partial \phi} \right] + \frac{V}{a^2} \left[ \left( \frac{\partial \psi'}{\partial \phi} \right)^2 - \psi' \frac{\partial^2 \psi'}{\partial \phi^2} \right] \\ & \frac{f_0^2}{N^2} \left\{ \frac{U}{a \cos \phi} \left[ \frac{\partial \psi'}{\partial \lambda} \frac{\partial \psi'}{\partial z} - \psi' \frac{\partial^2 \psi'}{\partial \lambda \partial z} \right] + \frac{V}{a} \left[ \frac{\partial \psi'}{\partial \phi} \frac{\partial \psi'}{\partial z} - \psi' \frac{\partial^2 \psi'}{\partial \phi \partial z} \right] \right\} \end{aligned} \right\} \quad (\text{S3})
\end{aligned}$$

32 where the superscript is the zonal deviation and where  $\phi, \lambda, \Phi, f = 2\Omega \sin \phi, a, \Omega$  are the  
33 latitude, longitude, geopotential height, Coriolis parameter, earth radius and Earth  
34 rotation rate, respectively.  $\psi' = \frac{\phi'}{f}$  represents the perturbation of the quasi-geostrophic  
35 stream function relative to the climatological field, and  $\mathbf{U} = (U, V)$  represents the  
36 climatological basic flow fields.

37

38 In Eqs. (S1)–(S3), the overbar represents zonal mean, while the prime indicates  
39 deviations from zonal mean. The subscripts denote partial derivatives. The Fourier  
40 decomposition is used to extract components  $u', v',$  and  $\theta'$  in Eqs. (S1)–(S3) and  
41 components  $\psi'$  in Eqs. (S3) with different zonal wave numbers.

42

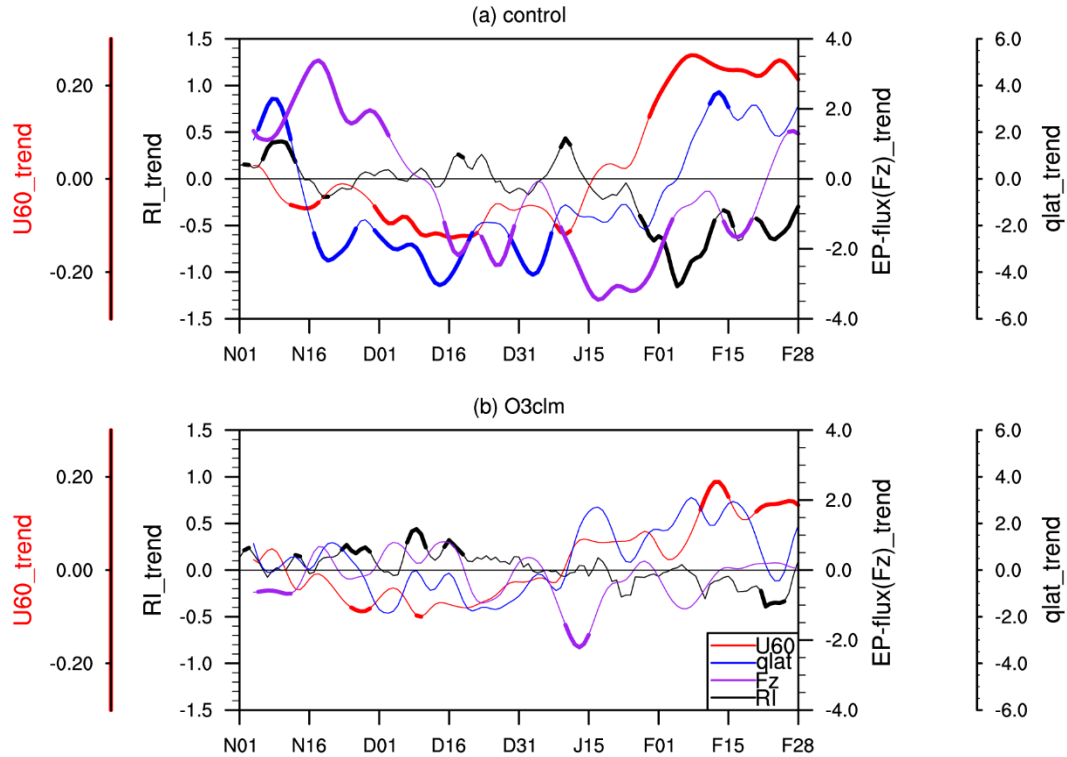

**Figure S1** Daily evolution of the trends in the RI (black lines), vertical component of the E-P flux ( $F_z$ ; purple lines),  $\bar{q}_\phi$  (blue lines), U60 (zonal wind at 60°N; red lines) before 2000 at 50–150 hPa averaged in mid-latitude (55°–70° N) from 1 November to 28 February, derived from (a) the ensemble mean of the control experiments and (b) O3clm experiments. The bold solid lines indicate the trends in the significant RI, vertical component of the E-P flux and  $\bar{q}_\phi$  at the 90% confidence level according to Student's  $t$  test (The daily data are first processed with a 7-day low-pass filter to remove high-frequency signals).

## References

Chen, P. and Robinson, W. A.: Propagation of Planetary Waves between the Troposphere and Stratosphere, J. Atmos. Sci., 49, 2533–2545, [https://doi.org/10.1175/1520-0469\(1992\)049<2533:POPWBT>2.0.CO;2](https://doi.org/10.1175/1520-0469(1992)049<2533:POPWBT>2.0.CO;2), 1992.

- 57 Takaya, K. and Nakamura, H.: A formulation of a wave - activity flux for stationary  
58 Rossby waves on a zonally varying basic flow, *Geophys. Res. Lett.*, 24, 2985–  
59 2988, <https://doi.org/10.1029/97GL03094>, 1997.
- 60 Takaya, K. and Nakamura, H.: A Formulation of a Phase-Independent Wave-Activity  
61 Flux for Stationary and Migratory Quasigeostrophic Eddies on a Zonally Varying  
62 Basic Flow, *J. Atmos. Sci.*, 58, 608–627, [https://doi.org/10.1175/1520-  
63 0469\(2001\)058<0608:AFOAPI>2.0.CO;2](https://doi.org/10.1175/1520-0469(2001)058<0608:AFOAPI>2.0.CO;2), 2001.
- 64 Matsuno, T.: Vertical Propagation of Stationary Planetary Waves in the Winter Northern  
65 Hemisphere, *J. Atmos. Sci.*, 27, 871–883, [https://doi.org/10.1175/1520-  
66 0469\(1970\)027<0871:VPOSPW>2.0.CO;2](https://doi.org/10.1175/1520-0469(1970)027<0871:VPOSPW>2.0.CO;2), 1970.
- 67 Nakamura, M., Kadota, M., and Yamane, S.: Quasigeostrophic Transient Wave  
68 Activity Flux: Updated Climatology and Its Role in Polar Vortex Anomalies, *J.*  
69 *Atmos. Sci.*, 67, 3164–3189, <https://doi.org/10.1175/2010JAS3451.1>, 2010.
